# Supplementary material for: In situ investigation of dissociation and migration phenomena at the Pt/electrolyte interface of an electrochemical cell
Source: Royal Society of Chemistry journal article supplement (doi:10.1039/c5sc01421b), 2015-01-01
Supplement: c5sc01421b1.pdf [file c5sc01421b1.pdf]

# In situ Investigation of Dissociation and Migration Phenomena at the Pt/Electrolyte Interface of an Electrochemical Cell

Yeuk Ting Law,<sup>a</sup> Spyridon Zafeiratos,<sup>a</sup> Stylianos G. Neophytides,<sup>b</sup> Alin Orfanidi,<sup>b</sup> Dominique Costa,<sup>c</sup> Thierry Dintzer,<sup>a</sup> Rosa Arrigo,<sup>d,e</sup> Axel Knop-Gericke,<sup>d</sup> Robert Schlögl,<sup>d,e</sup> Elena R. Savinova<sup>\*a</sup>

<sup>a</sup> Institut de Chimie et Procédés pour l'Energie, l'Environnement et la Santé, UMR 7515 - CNRS-UdS-ECPM, 25 rue Becquerel, 67087 Strasbourg, France.

<sup>b</sup> Institute of Chemical Engineering Sciences, Stadiou Str., Platani GR-26504, Rion Achaïas, Patras, Greece.

<sup>c</sup> Laboratoire de Physico-Chimie des Surfaces, ENSCP, CHIMIE-PARISTECH, 11, rue Pierre et Marie CURIE, 75005 Paris, France.

<sup>d</sup> Fritz-Haber-Institut der MPG, Faradayweg 4-6, D-14195 Berlin (Dahlem), Germany

<sup>e</sup> Max-Planck-Institut for Chemical Energy Conversion, Stiftstr. 34-36, 45470 Mülheim

## Electronic Supplementary information

### S1. Influence of the cell bias on the apparent binding energy

Application of a voltage between the working (WE) and the counter (CE) electrodes is expected to result in the BE shift ( $\Delta BE$ ) in accordance with equation S1:

$$\Delta BE = BE - BE_{OCV} = -e(V_{WE-CE} - iR - \eta_{CE}) \quad (\text{Eq S1})$$

Here  $i$  is current,  $BE_{OCV}$  is the BE value at the open circuit voltage,  $R$  is the electrical resistance of the membrane-electrode assembly, and  $\eta_{CE}$  is overpotential at the counter electrode (i.e. the difference between the actual and the equilibrium potential value). The experiments showed that either the increase of the water vapor pressure (from 0 to 0.3 mbar) or the increase of the temperature (from room temperature to 180°C) resulted in a decrease of  $R$ .

## SI2. Contribution of O from polymer membrane and O from Pt oxides to the overall O 1s XP peak

### Contribution of polymer membrane species to the O 1s peak:

C 1s and O 1s spectra recorded over an undoped polymer membrane (before imbibing it with PA) were used as a reference in order to estimate the relative contribution in the O 1s peak of oxygen species derived from the membrane as compared to those of the PA. The O:C peak area ratio for the undoped membrane was equal to  $0.17 \pm 0.2$  while in case of PA imbibed membrane at 0 V this ratio was  $3.0 \pm 0.2$ . Therefore one can assume that membrane-derived oxygen species contribute less than 6 % to the overall O 1s signal.

### Contribution of PtO<sub>x</sub> species to the O 1s peak:

In order to estimate the contribution of the oxidized Pt species in the O 1s peak we have used the following procedure: first, the amount of oxidized Pt was determined by numerical subtraction of the Pt 4f spectrum recorded at OCV from spectra recorded at 1.3 and 1.6 bias voltages, as shown in figure S1 (left). Then, the upper bound for the amount of oxygen corresponding to oxidized Pt was estimated assuming a Pt:O stoichiometry 1:2, taking into account the electron photoionization cross sections and differences in the photon flux using the following equation:

$$\frac{I_{PtO_2} / I_{Pt}^{\infty}}{I_O / I_O^{\infty}} = \frac{1}{2}$$

Here  $I_{PtO_2}$  is the experimental intensity (in Counts Per Second) of the Pt 4f peak corresponding to oxidized Pt (PtO<sub>2</sub>) estimated by the subtraction procedure shown in fig. S1 (left).  $I_{Pt}^{\infty}$  and  $I_O^{\infty}$  are the normalization factors, and  $I_O$  the expected intensity contribution of the O 1s component due to platinum oxide. This procedure gave an estimated contribution of Pt oxide-related species which did not exceeds 5 % of the overall O 1s peak signal (3.7 % for 1.3V and 4.4 for 1.6V). A characteristic O 1s spectrum (at 1.6 V) after deconvolution taking into account a O 1s component due to the platinum oxide contribution to the overall O 1s spectrum is shown in S1 (right):

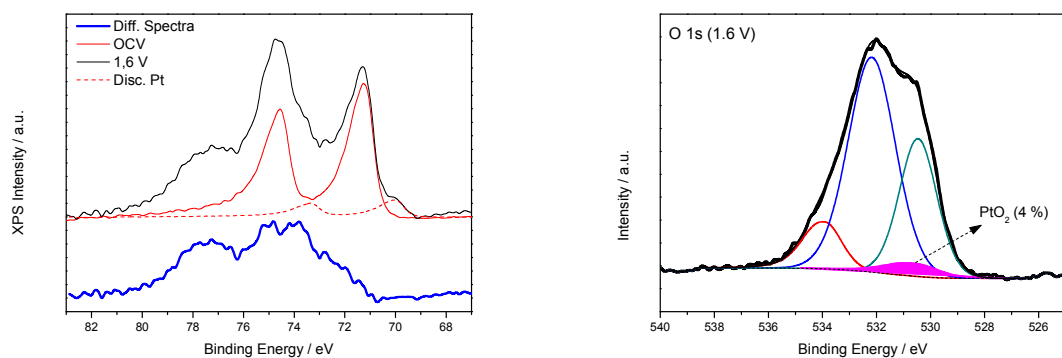

Figure S1. *Left* : Black – Pt4f spectrum collected at 1.6 V bias. Red solid line - Pt 4f spectrum collected at the OCV. Blue - the contribution of the ionic (oxidized) Pt species to the overall Pt 4f spectrum obtained through subtraction of the metallic Pt species (spectrum taken at the OCV) from the spectrum taken at 1.6 V. Red dashed line shows the contribution of disconnected metallic Pt particles. *Right*: Suggested O 1s peak deconvolution including a O 1s component due to the ionic Pt ( $\text{PtO}_2$ ) species. In order to select the binding energy of the O 1s component resulting from  $\text{PtO}_x$  species, literature values were used, while the intensity of the peak was estimated as described above.

### SI3. P/O atomic ratio

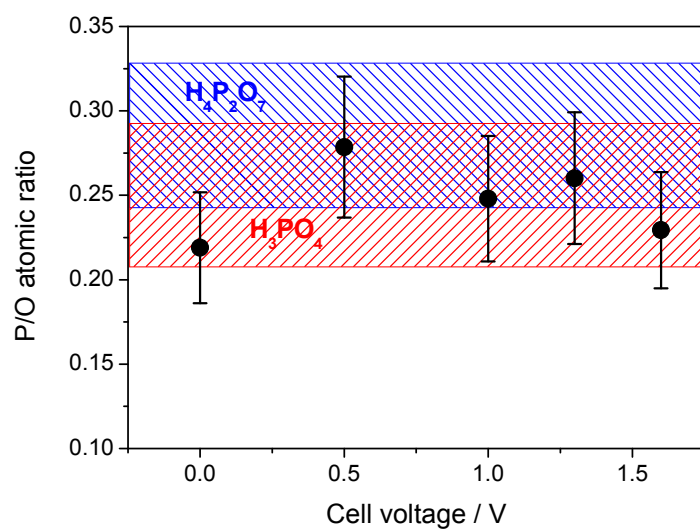

Figure S2. The P:O atomic ratio calculated from *in situ* NAPXPS spectra as a function of the cell voltage. Red- and blue-hatched intervals correspond to the P:O atomic ratio of  $\text{H}_3\text{PO}_4$  ( $0.25 \pm 0.04$ ) and  $\text{H}_4\text{P}_2\text{O}_7$  ( $0.29 \pm 0.04$ ), respectively (estimated error of  $\pm 15\%$ ).

#### SI4. DFT Calculations

**Table S1. BE shifts calculated with the DFT method**

| Molecule/ion                                                                                             | Functional group                                                              | O1s BE shift * /eV                                                           |
|----------------------------------------------------------------------------------------------------------|-------------------------------------------------------------------------------|------------------------------------------------------------------------------|
| H <sub>3</sub> PO <sub>4</sub>                                                                           | P=O<br>P-O-H                                                                  | 0<br>2.0-2.1                                                                 |
| H <sub>2</sub> O                                                                                         | H <sub>2</sub> O                                                              | 1.2                                                                          |
| H <sub>3</sub> PO <sub>4</sub><br>H-bonded (Figure S2-a))                                                | P=O<br>P-O-H<br>P=O...H<br>P-O-H...O                                          | 0.0<br>2.3<br>1.1±0.1<br>1.6±0.1                                             |
| H <sub>3</sub> PO <sub>4</sub> + H <sub>2</sub> O<br>H-bonded (Figure S2-b))                             | P-OH<br>P=O...H <sub>2</sub> O<br>P-OH...H <sub>2</sub> O<br>H <sub>2</sub> O | 2.3<br>0.47<br>1.8<br>1.6                                                    |
| H <sub>4</sub> P <sub>2</sub> O <sub>7</sub>                                                             | P=O<br>P-O-H<br>P-O-P                                                         | 0<br>2.1<br>2.3                                                              |
| H <sub>4</sub> P <sub>2</sub> O <sub>7</sub>                                                             | P-O-H<br>P-O-P<br>P=O...H<br>P-O-H...O                                        | 2.2-2.3<br>2.3<br>1.0<br>1.6                                                 |
| H <sub>4</sub> P <sub>2</sub> O <sub>7</sub> + H <sub>2</sub> O                                          | P-O-P<br>P=O...H<br>P-OH...O<br>H <sub>2</sub> O                              | 2.3<br>0.5<br>1.6-2.0<br>1.8                                                 |
| H <sub>2</sub> PO <sub>4</sub> <sup>-</sup> or H <sub>3</sub> P <sub>2</sub> O <sub>7</sub> <sup>-</sup> | P-O <sup>-</sup><br>P-OH                                                      | -0.2 - 0<br>2.2                                                              |
| H <sub>2</sub> PO <sub>4</sub> <sup>-</sup> + H <sub>2</sub> O<br>H-bonded (Figure S2-c))                | P-OH<br>P=O...H <sub>2</sub> O<br>P-OH...H <sub>2</sub> O<br>H <sub>2</sub> O | 2.3<br>0.3<br>1.65<br>2.02                                                   |
| H <sub>2</sub> PO <sub>4</sub> <sup>-</sup> chemisorbed on Pt                                            | Pt-O-P<br>P-OH                                                                | 1.3<br>2.2                                                                   |
| HPO <sub>4</sub> <sup>2-</sup> chemisorbed on Pt                                                         | P-OH<br>Pt-O-P                                                                | 2.2<br>1.4                                                                   |
| PO <sub>4</sub> <sup>3-</sup> chemisorbed on Pt                                                          | P=O<br>Pt-O-P                                                                 | 0.15<br>1.80                                                                 |
| H <sub>4</sub> P <sub>2</sub> O <sub>7</sub> chemisorbed on Pt                                           | P=O<br>P-OH<br>P-O-P<br>Pt-O-P                                                | 0.28<br>2.20<br>2.20<br>2.20                                                 |
| H <sub>3</sub> O <sup>+</sup>                                                                            | O-H <sup>+</sup>                                                              | 8                                                                            |
| H <sub>4</sub> PO <sub>4</sub> <sup>+</sup>                                                              | O-H <sup>+</sup>                                                              | 8                                                                            |
| H <sub>4</sub> PO <sub>4</sub> <sup>+</sup> chemisorbed on Pt                                            | Pt-O-P                                                                        | 3 to 2 eV depending on the orientation of the ion relative to the Pt surface |

\*O1s BE shift is referred to O of P=O of a H<sub>3</sub>PO<sub>4</sub> molecule in the gas phase.

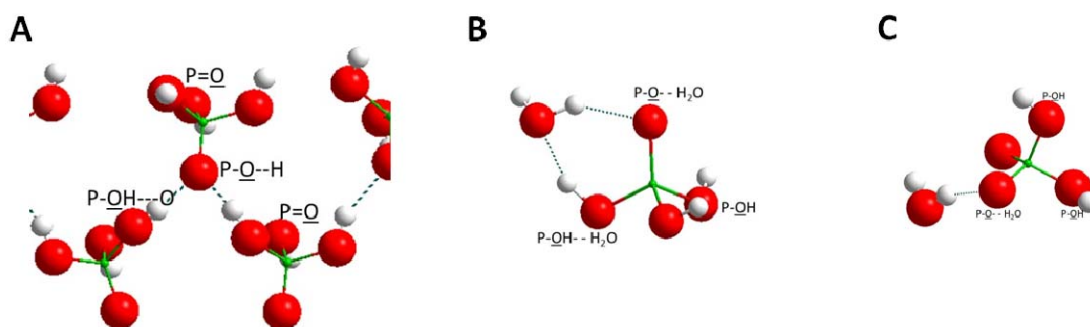

Figure S3: Optimized configurations obtained using the DFT calculations for A)  $\text{H}_3\text{PO}_4$  molecules in a H-bonded network, B)  $\text{H}_3\text{PO}_4$  H-bonded with water, C)  $\text{H}_2\text{PO}_4^-$  H-bonded with water.

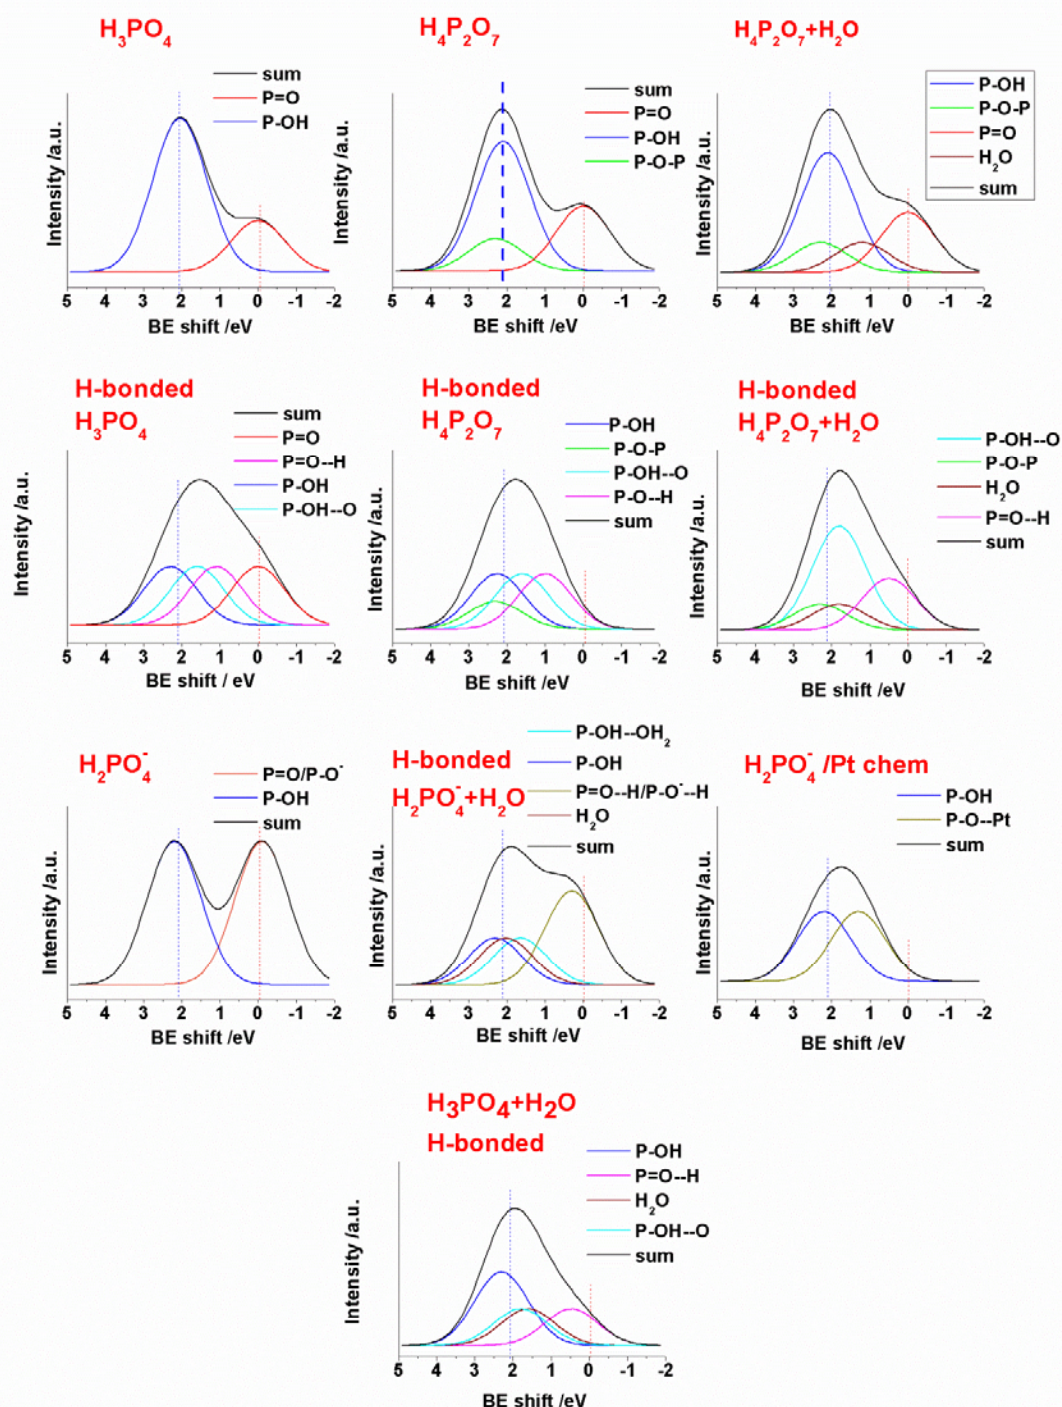

Figure S4. PE spectra simulated for various molecular configurations using BE shifts calculated with the DFT. As the first approximation spectra were simulated assuming Gaussian peak shape. Red and blue dashed lines mark positions of the O 1s peak characteristic for P=O and P-OH groups of  $\text{H}_3\text{PO}_4$  in the gas phase.

**SI5. Variation of the Pt/P atomic ratio with the cell voltage: response to the voltage bias reversal**

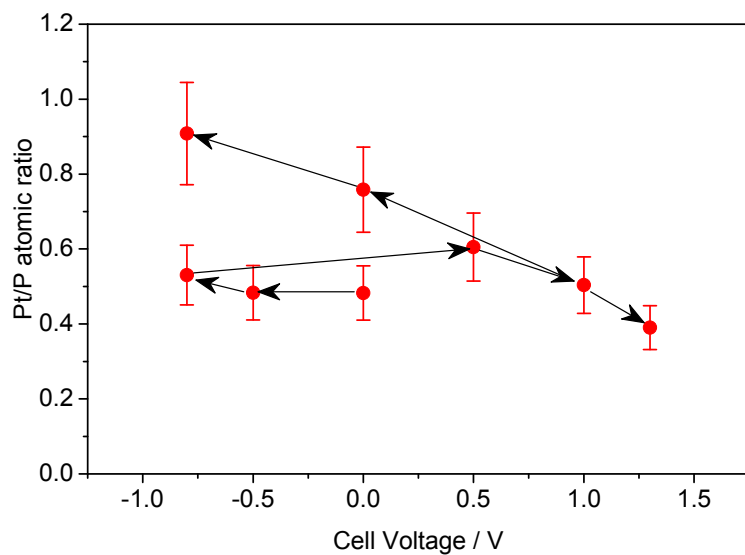

Figure S5. Evolution of the Pt/P atomic ratio with the cell voltage. The arrows show the direction of the potential cycling. The figure shows a decrease of the Pt/P atomic ratio upon application of the positive voltage bias, and its increase upon bias reversal. Temperature is 180°C and water vapor pressure is 0.3 mbar. Kinetic energy of photoelectrons is equal to 580 eV.
